# Supplementary material
Source: PubMed Central journal article supplement (PMC7067681)
Supplement: NIHMS1543705-supplement-1.pdf [file NIHMS1543705-supplement-1.pdf]

**SUPPLEMENTARY TABLES**

**Supplementary Table 1**

Demographic Differences Between A $\beta$ + / A $\beta$ - Within Cohort

| Variables                                | HABS<br>n=290     |                  |                            | AIBL<br>n=272     |                  |                            | ADNI<br>n=246     |                  |                            |
|------------------------------------------|-------------------|------------------|----------------------------|-------------------|------------------|----------------------------|-------------------|------------------|----------------------------|
|                                          | High<br>A $\beta$ | Low<br>A $\beta$ | High vs.<br>Low<br>p-value | High<br>A $\beta$ | Low<br>A $\beta$ | High vs.<br>Low<br>p-value | High<br>A $\beta$ | Low<br>A $\beta$ | High vs.<br>Low<br>p-value |
| n                                        | 73                | 217              |                            | 84                | 187              |                            | 110               | 237              |                            |
| Age, mean, SD                            | 74.80<br>(6.09)   | 72.76<br>(6.37)  | .015                       | 75.51<br>(6.28)   | 70.95<br>(5.86)  | <.001                      | 76.16<br>(6.15)   | 73.88<br>(6.54)  | .002                       |
| Female sex, %                            | 61                | 59               | .710                       | 45                | 57               | .013                       | 64                | 48               | .005                       |
| Education,<br>mean, SD                   | 16.15<br>(2.93)   | 15.76<br>(3.06)  | .327                       | 13.64<br>(2.24)   | 13.67<br>(2.31)  | .919                       | 16.05<br>(1.10)   | 16.67<br>(1.27)  | <.001                      |
| MMSE, mean,<br>SD                        | 28.84<br>(1.08)   | 29.08<br>(1.08)  | .093                       | 28.73<br>(1.30)   | 28.94<br>(1.16)  | .207                       | 28.91<br>(1.76)   | 29.08<br>(1.34)  | .369                       |
| PACC, mean,<br>SD                        | -0.03<br>(0.67)   | 0.00<br>(0.65)   | .699                       | -0.18<br>(0.68)   | 0.10<br>(0.62)   | .002                       | -0.09<br>(0.60)   | 0.06<br>(0.62)   | .033                       |
| Progressors to<br>MCI at year 3+,<br>%   | 20                | 1                | <.001                      | 26                | 7                | <.001                      | 32                | 10               | <.001                      |
| Progressors to<br>CDR>0 at year<br>3+, % | 23                | 7                | <.001                      | 31                | 8                | <.001                      | 39                | 12               | <.001                      |

---

NOTE. Means and Standard Deviations reported unless otherwise noted. HABS: Harvard Aging Brain Study, AIBL: Australian Biomarker and Lifestyle Study, ADNI: Alzheimer's Disease Neuroimaging Initiative, MMSE: Mini-Mental State Exam, PACC: Preclinical Alzheimer's Cognitive Composite (5-component)

Journal Pre-proof

## Supplementary Table 2

Linear mixed effect models showing change in PACC over 3 years amongst the A $\beta$ +/- participants by cohort (PACC~time+Age+Sex+Education) using random slopes and intercepts.

| Model Terms  | A $\beta$ +  |            |                          |             | A $\beta$ -  |            |                          |              |
|--------------|--------------|------------|--------------------------|-------------|--------------|------------|--------------------------|--------------|
|              | <b>HABS</b>  |            |                          |             |              |            |                          |              |
|              | <b>b</b>     | <b>df</b>  | <b>Estimate<br/>(SE)</b> | <b>p</b>    | <b>b</b>     | <b>df</b>  | <b>Estimate<br/>(SE)</b> | <b>p</b>     |
| Intercept    | -0.01        | 204        | -0.07 (0.09)             | .938        | 0.07         | 613        | 1.54(0.05)               | .124         |
| <b>Time</b>  | <b>-0.11</b> | <b>204</b> | <b>-4.04(0.03)</b>       | <b>.000</b> | <b>0.03</b>  | <b>613</b> | <b>3.05(0.01)</b>        | <b>.002*</b> |
| Age          | -0.02        | 69         | -1.26(0.01)              | .212        | -0.03        | 215        | -5.11(0.01)              | .000         |
| Sex          | -0.12        | 69         | -0.79(0.16)              | .429        | -0.30        | 215        | -4.03(0.08)              | .001         |
| <b>Educ.</b> | <b>0.07</b>  | <b>69</b>  | <b>2.59(0.03)</b>        | <b>.011</b> | <b>0.09</b>  | <b>215</b> | <b>7.07(0.01)</b>        | <b>.000</b>  |
|              | <b>AIBL</b>  |            |                          |             |              |            |                          |              |
| Intercept    | 1.06         | 127        | 1.33(0.79)               | .184        | 0.84         | 299        | 1.54(0.55)               | .125         |
| <b>Time</b>  | <b>-0.08</b> | <b>127</b> | <b>-2.69(0.03)</b>       | <b>.007</b> | -0.01        | 299        | -0.44(0.01)              | .657         |
| <b>Age</b>   | <b>-0.04</b> | <b>80</b>  | <b>-4.46(0.01)</b>       | <b>.000</b> | <b>-0.03</b> | <b>183</b> | <b>-4.09(0.01)</b>       | <b>.000</b>  |
| <b>Sex</b>   | <b>0.34</b>  | <b>80</b>  | <b>2.80(0.12)</b>        | <b>.006</b> | <b>0.25</b>  | <b>183</b> | <b>3.09(0.08)</b>        | <b>.002</b>  |
| <b>Educ.</b> | <b>0.13</b>  | <b>80</b>  | <b>4.79(0.03)</b>        | <b>.000</b> | <b>0.08</b>  | <b>183</b> | <b>4.57(0.02)</b>        | <b>.000</b>  |
|              | <b>ADNI</b>  |            |                          |             |              |            |                          |              |
| Intercept    | 1.15         | 284        | 1.36(0.84)               | .174        | 0.18         | 632        | 0.36(0.49)               | .716         |
| <b>Time</b>  | <b>-0.11</b> | <b>284</b> | <b>-4.02(0.03)</b>       | <b>.000</b> | -0.02        | 632        | -1.26(0.01)              | .206         |
| <b>Age</b>   | <b>-0.02</b> | <b>106</b> | <b>-2.57(0.01)</b>       | <b>.011</b> | <b>-0.02</b> | <b>233</b> | <b>-3.00(0.01)</b>       | <b>.003</b>  |
| Sex          | 0.18         | 106        | 1.44(0.13)               | .153        | 0.13         | 233        | 1.77(0.07)               | .078         |
| <b>Educ.</b> | <b>0.03</b>  | <b>106</b> | <b>1.64(0.02)</b>        | <b>.104</b> | <b>0.06</b>  | <b>233</b> | <b>4.50(0.01)</b>        | <b>.000</b>  |

---

NOTE. HABS: Harvard Aging Brain Study, AIBL: Australian Biomarker and Lifestyle Study, ADNI: Alzheimer's Disease Neuroimaging Initiative, PACC: Preclinical Alzheimer's Cognitive Composite (5-component)

\*indicates improvement in performance over time

Journal Pre-proof

**Supplementary Table 3**

**Cox Regression Analyses Testing the limits of Risk for Progression to MCI at year 3+ in A $\beta$ + in HABS**

| Restricting PACC Slope to 2 years            |                    |              |                |              |             |
|----------------------------------------------|--------------------|--------------|----------------|--------------|-------------|
|                                              | Model Terms        | Hazard Ratio | Standard Error | Estimate     | p-value     |
|                                              | PACC Slope         | 0.031        | 4.119          | -0.84        | .399        |
|                                              | PACC Intercept     | 0.867        | 0.604          | -0.22        | .825        |
|                                              | Age                | 1.036        | 0.073          | 1.36         | .172        |
|                                              | <b>Sex*</b>        | <b>0.076</b> | <b>1.099</b>   | <b>-2.46</b> | <b>.013</b> |
|                                              | Education          | 0.917        | 0.154          | 0.25         | .803        |
| Restricting PACC Slope to 1 year             |                    |              |                |              |             |
|                                              | PACC Slope         | 1.232        | 1.781          | 0.12         | .906        |
|                                              | PACC Intercept     | 0.749        | 0.649          | -0.45        | .656        |
|                                              | Age                | 1.133        | 0.072          | 1.75         | .079        |
|                                              | <b>Sex*</b>        | <b>0.077</b> | <b>1.081</b>   | <b>-2.37</b> | <b>.017</b> |
|                                              | Education          | 1.081        | 0.134          | 0.58         | .563        |
|                                              |                    |              |                |              |             |
| 3-year slopes for individual PACC components |                    |              |                |              |             |
| <b>MMSE</b>                                  | <b>MMSE Slope*</b> | <b>0.089</b> | <b>0.572</b>   | <b>-4.22</b> | <b>.000</b> |
|                                              | MMSE Intercept     | 0.750        | 0.265          | -1.08        | .279        |
|                                              | Age                | 1.095        | 0.050          | -1.79        | .072        |
|                                              | <b>Sex*</b>        | 0.100        | 0.804          | -2.85        | .004        |
|                                              | Education          | 2.307        | 0.117          | 2.27         | .023        |
|                                              |                    |              |                |              |             |

|              |                         |               |              |              |             |
|--------------|-------------------------|---------------|--------------|--------------|-------------|
| <b>FCSRT</b> | <b>FCSRT Slope*</b>     | <b>0.689</b>  | <b>0.079</b> | <b>-4.67</b> | <b>.000</b> |
|              | <b>FCSRT Intercept*</b> | <b>0.865</b>  | <b>0.052</b> | <b>-2.77</b> | <b>.005</b> |
|              | Age                     | 1.071         | 0.053        | 1.27         | .302        |
|              | <b>Sex*</b>             | <b>-2.326</b> | <b>0.805</b> | <b>-2.88</b> | <b>.003</b> |
|              | Education*              | 0.320         | 0.120        | 2.68         | .007        |
|              |                         |               |              |              |             |
| <b>DSST</b>  | <b>DSST Slope*</b>      | <b>0.729</b>  | <b>0.112</b> | <b>-2.81</b> | <b>.004</b> |
|              | <b>DSST Intercept</b>   | 0.975         | 0.026        | -0.93        | .352        |
|              | Age                     | 1.019         | 0.053        | 0.36         | .716        |
|              | <b>Sex*</b>             | <b>0.087</b>  | <b>0.886</b> | <b>-2.75</b> | <b>.005</b> |
|              | Education               | 1.158         | 0.118        | 1.24         | .212        |
|              |                         |               |              |              |             |
| <b>LMDR</b>  | <b>LMDR Slope*</b>      | <b>0.229</b>  | <b>0.320</b> | <b>-4.59</b> | <b>.000</b> |
|              | <b>LMDR Intercept</b>   | 0.870         | 0.105        | -1.32        | .186        |
|              | Age                     | 1.046         | 0.045        | 1.01         | .315        |
|              | <b>Sex*</b>             | <b>0.178</b>  | <b>0.821</b> | <b>-2.09</b> | <b>.036</b> |
|              | Education               | 1.068         | 0.096        | 0.69         | .489        |
|              |                         |               |              |              |             |
| <b>CAT</b>   | <b>CAT Slope*</b>       | <b>0.626</b>  | <b>0.150</b> | <b>-3.09</b> | <b>.001</b> |
|              | <b>CAT Intercept*</b>   | <b>0.890</b>  | <b>0.041</b> | <b>-2.81</b> | <b>.004</b> |
|              | Age                     | 1.017         | 0.054        | 0.32         | .744        |
|              | <b>Sex*</b>             | <b>0.105</b>  | <b>0.792</b> | <b>-2.83</b> | <b>.004</b> |
|              | Education               | 1.221         | 0.108        | 1.83         | .069        |

NOTE. In all Cox Regression Models above, there are a total of 58 observations and 12 instances of progression to MCI at year 3+. HABS: Harvard Aging Brain Study, PACC5: Preclinical Alzheimer's Cognitive Composite (5-component), MMSE: Mini Mental Status Exam, FCSRT: Free and Cued Selective Reminding Test, DSST: Digit Symbol Substitution Test, LMDR: Logical Memory Delayed Recall, CAT: Category Fluency

Journal Pre-proof

**Supplementary Table 4**

Predictive Utility of Various PACC Slope Cutpoints to MCI Diagnosis: Receiver Operator Curve (ROC)

| Study | AUC                      | SE          | p           |
|-------|--------------------------|-------------|-------------|
| HABS  | .695                     | .078        | .016        |
| AIBL  | .869                     | .061        | .000        |
| ADNI  | .783                     | .067        | .000        |
|       | Coordinates of the Curve |             |             |
|       | Positive if <            | Specificity | Sensitivity |
| HABS  | -2.25                    | 100.00      | 0.00        |
|       | -.40                     | 99.95       | 17.60       |
|       | -.33                     | 99.89       | 35.30       |
|       | -.26                     | 99.86       | 41.20       |
|       | -.21                     | 99.82       | 52.90       |
|       | -.16                     | 99.80       | 58.80       |
|       | -.15                     | 99.75       | 64.70       |
|       | -.14                     | 99.71       | 64.70       |
|       | -.12                     | 99.66       | 64.70       |
|       | -.10                     | 99.62       | 64.70       |
|       | -.09                     | 99.60       | 70.60       |
|       | -.08                     | 99.55       | 70.60       |
|       | -.06                     | 99.47       | 76.50       |
|       | .00                      | 99.35       | 82.40       |
|       | .04                      | 99.26       | 88.20       |
|       | .09                      | 99.16       | 88.20       |
|       | .11                      | 99.15       | 88.20       |
|       | .14                      | 99.11       | 94.10       |
|       | .19                      | 99.09       | 100.00      |
|       |                          |             |             |
| AIBL  | -1.97                    | 100.00      | 0.00        |
|       | -.87                     | 100.00      | 8.30        |
|       | -.65                     | 100.00      | 16.70       |
|       | -.44                     | 100.00      | 25.00       |
|       | -.32                     | 99.97       | 41.70       |
|       | -.29                     | 99.97       | 50.00       |
|       | -.19                     | 99.91       | 66.70       |
|       | -.17                     | 99.88       | 66.70       |
|       | -.16                     | 99.88       | 75.00       |



|      |       |        |        |
|------|-------|--------|--------|
|      | -.15  | 99.85  | 75.00  |
|      | -.14  | 99.79  | 75.00  |
|      | -.13  | 99.76  | 75.00  |
|      | -.12  | 99.76  | 83.30  |
|      | -.10  | 99.73  | 83.30  |
|      | -.08  | 99.64  | 83.30  |
|      | -.05  | 99.55  | 83.30  |
|      | -.03  | 99.52  | 91.70  |
|      | .00   | 99.46  | 100.00 |
|      | .01   | 99.42  | 100.00 |
|      |       |        |        |
| ADNI | -2.01 | 100.00 | 0.00   |
|      | -.50  | 99.95  | 15.80  |
|      | -.43  | 99.95  | 21.10  |
|      | -.36  | 99.93  | 26.30  |
|      | -.31  | 99.90  | 63.20  |
|      | -.26  | 99.83  | 68.40  |
|      | -.21  | 99.80  | 73.70  |
|      | -.19  | 99.75  | 73.70  |
|      | -.16  | 99.73  | 78.90  |
|      | -.14  | 99.70  | 78.90  |
|      | -.10  | 99.65  | 78.90  |
|      | -.09  | 99.63  | 78.90  |
|      | -.05  | 99.58  | 78.90  |
|      | -.04  | 99.58  | 84.20  |
|      | -.03  | 99.53  | 84.20  |
|      | .00   | 99.45  | 84.20  |
|      | .02   | 99.38  | 89.50  |
|      | .03   | 99.30  | 94.70  |
|      | .12   | 99.15  | 100.00 |

NOTE. AUC=area under the curve; SE=standard error; HABS: Harvard Aging Brain Study, AIBL: Australian Biomarker and Lifestyle Study, ADNI: Alzheimer's Disease Neuroimaging Initiative, PACC: Preclinical Alzheimer's Cognitive Composite (5-component)
